# Supplementary material for: The Heat Shock Response in the Western Honey Bee (Apis mellifera) is Antiviral
Source: MDPI journal article supplement (doi:10.3390/v12020245), 2020-02-22
Supplement: s1 [file s1]

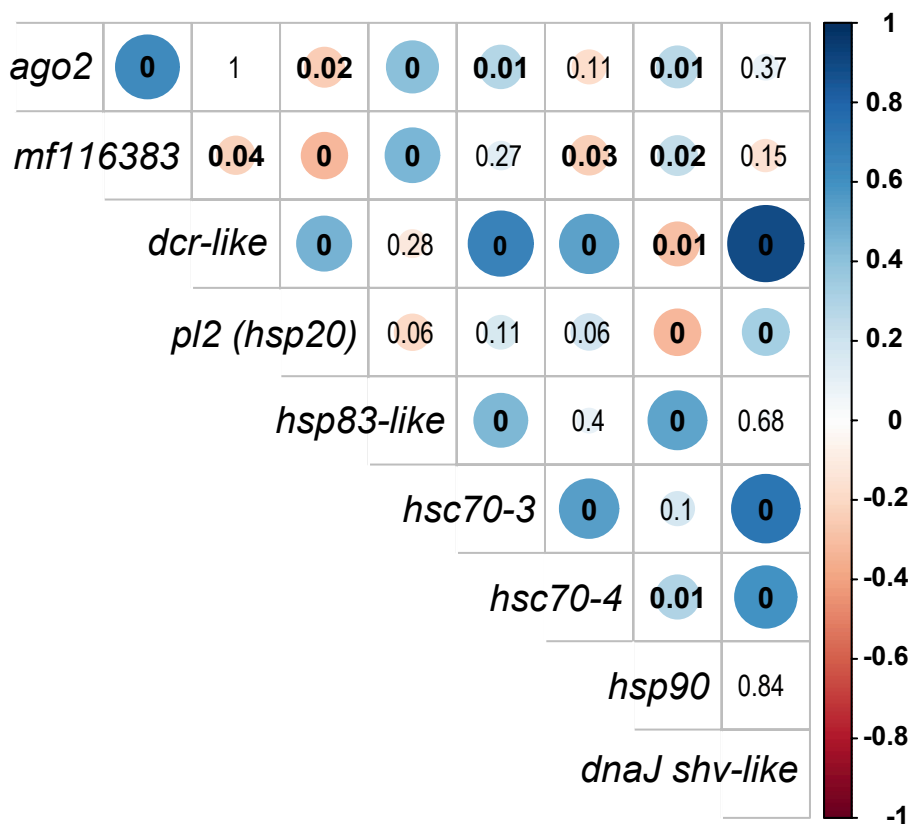

### Supplementary Figure S2. Honey bee gene co-expression p-value matrix

The co-expression of genes in virus-infected heat shocked honey bees was analyzed by calculating the correlation coefficient for each pairwise comparison, each of which were assessed by calculating a corresponding p-value, which are shown in each cell. Correlation coefficients (r-values) are determined to be significant when their corresponding p-value is below 0.05. Shaded blue circles represent positive correlations while shaded red circles denote negative correlations. The larger the circle, the stronger the correlation. The matrix illustrates several significant positive correlations between immune genes (*dcr-like*, *ago2*, and *mf116383*) and heat shock proteins (*pl2*, *hsp83-like*, *hsc70-3*, *hsc70-4*, *hsp90*, *dnaj shv-like*), including *dcr-like* and *dnaj shv-like*, *hsc70-3* and *dnaj shv-like*, and *dcr-like* and *hsc70-3*.
